# Supplementary material for: A new red fluorescent probe based on rosamine–phenothiazine for the highly selective and rapid detection of hypochlorite and its bioimaging in live cells
Source: Royal Society of Chemistry journal article supplement (doi:10.1039/d0nj02945a), 2020-01-01
Supplement: d0nj02945a1.pdf [file d0nj02945a1.pdf]

**Electronic Supplementary Information (ESI†)**

**A new red fluorescent probe based on the rosamine-phenothiazine  
for highly selective and rapid detection of hypochlorite and its  
bioimaging in live cells**

Yun Zhao<sup>a\*</sup>, Yuanyuan Xue<sup>b</sup>, Juanjuan Sun<sup>a</sup>, Hongli Xuan<sup>a</sup>, Yunli Xu<sup>a</sup>, Yapeng Cui<sup>a</sup>,  
and Jinlong Dong<sup>a</sup>

<sup>a</sup> Department of Chemistry, Taiyuan Normal University, Jinzhong 030619, China.

<sup>b</sup> Shanxi Analytical Science Academy, Shanxi, Taiyuan 030006, China.

\*Corresponding author. Tel./Fax.: +86 351 2886580;

E-mail address: zhaoyun19830317@163.com; yunzhao@tynu.edu.cn;



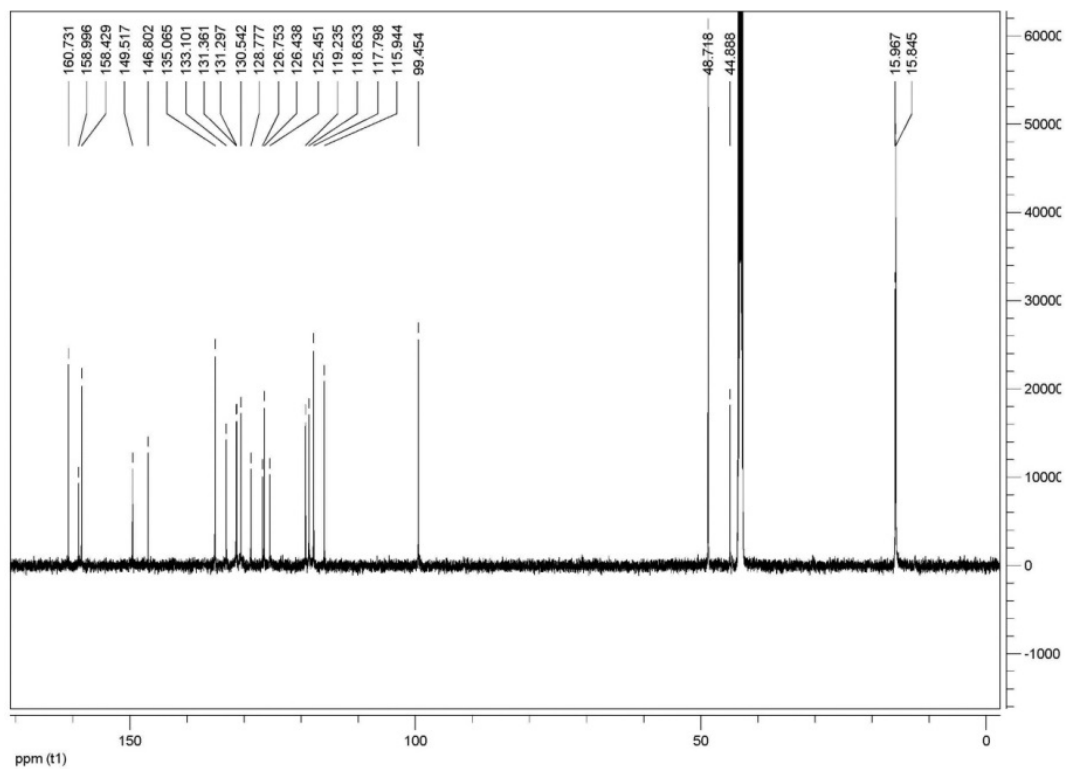

**Fig. S3**  $^{13}\text{C}$  NMR chart of compound **RCIO** ( $\text{CDCl}_3$ , 150 MHz).

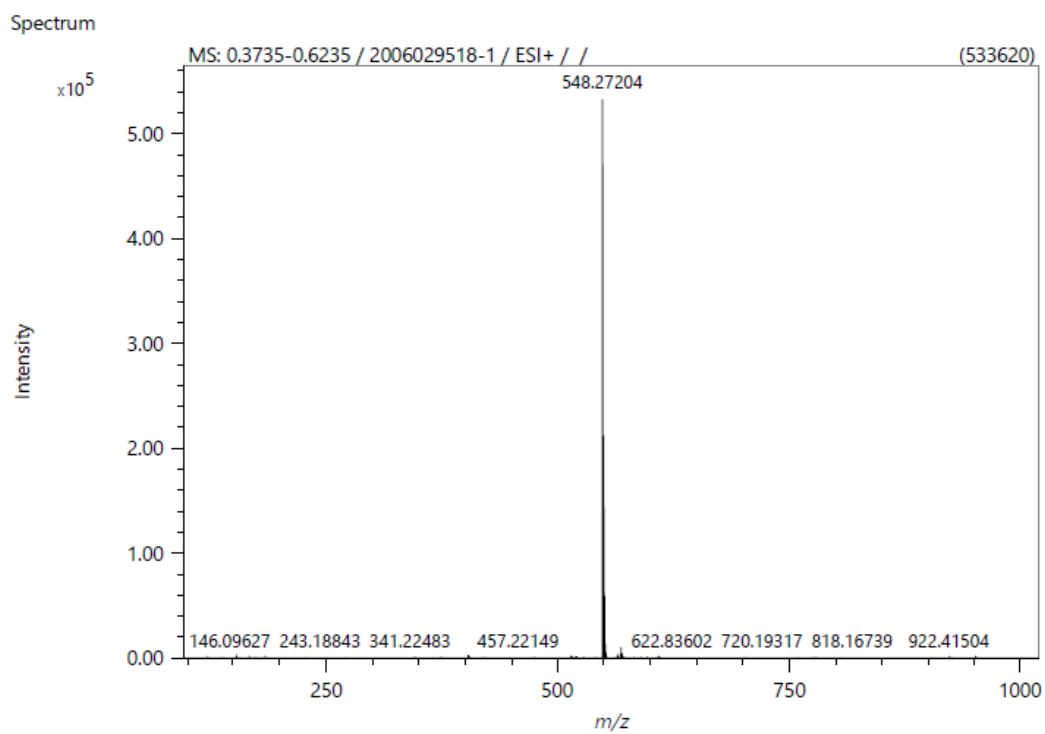

**Fig. S4** HRMS chart of compound **RCIO**.

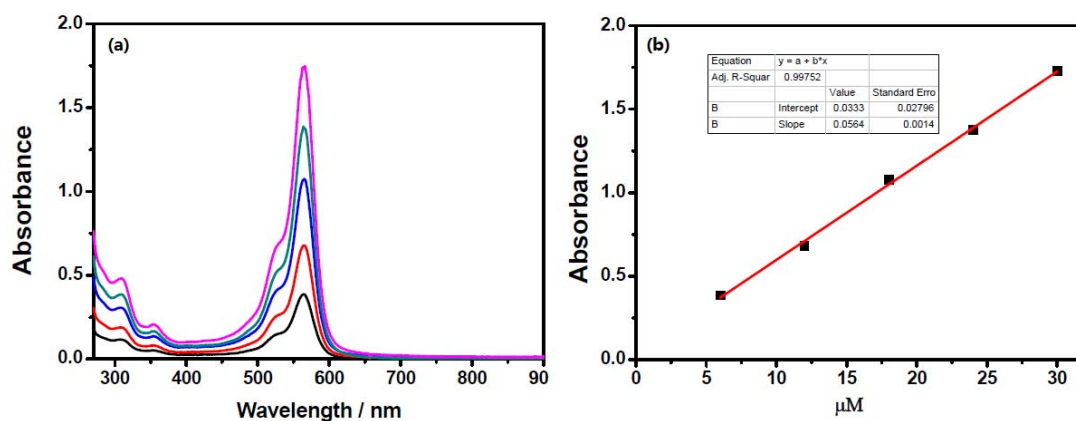

**Fig. S5** The solubility of probe **RCIO**. (a) Absorption spectra of the probe **RCIO** in PB buffer solution (pH 7.4, containing 20 % DMF as a co-solvent) and (b) plot of Absorbance against probe **RCIO** concentration 6-36 μM in PBS buffer solution.

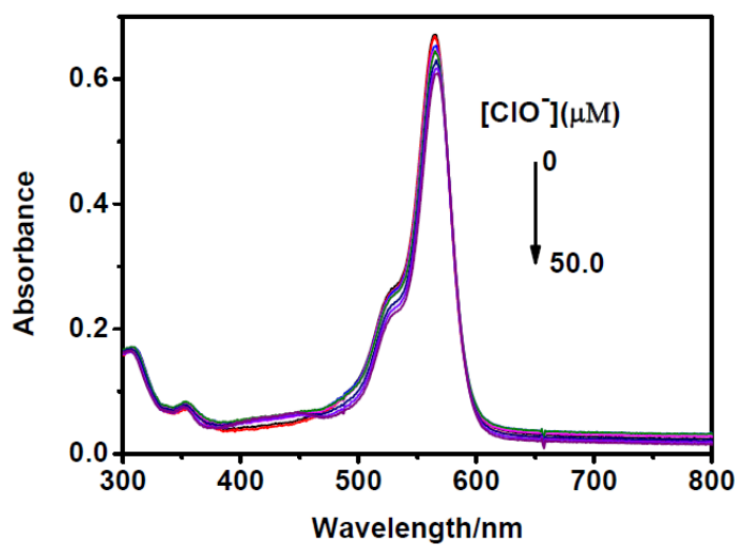

**Fig. S6** Absorption responses of the probe **RCIO** (12 μM) in the presence of ClO<sup>-</sup> (0-50.0 μM) in PB buffer (pH 7.4, 20 mM, containing 20% DMF).

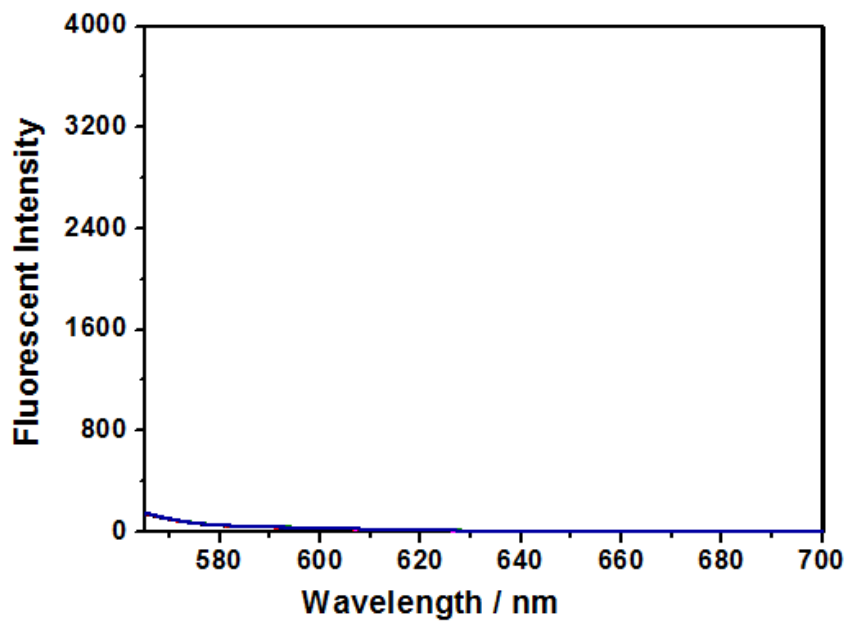

**Fig. S7.** Time-dependent fluorescence spectra of probe **RCIO** (12  $\mu$ M) excited at 560 nm in PB buffer (pH 7.4, 20 mM, containing 20% DMF). Time scale: 0–30 min.  
Ex/Em Slit: 5.0 nm, MT Voltage: 600 V

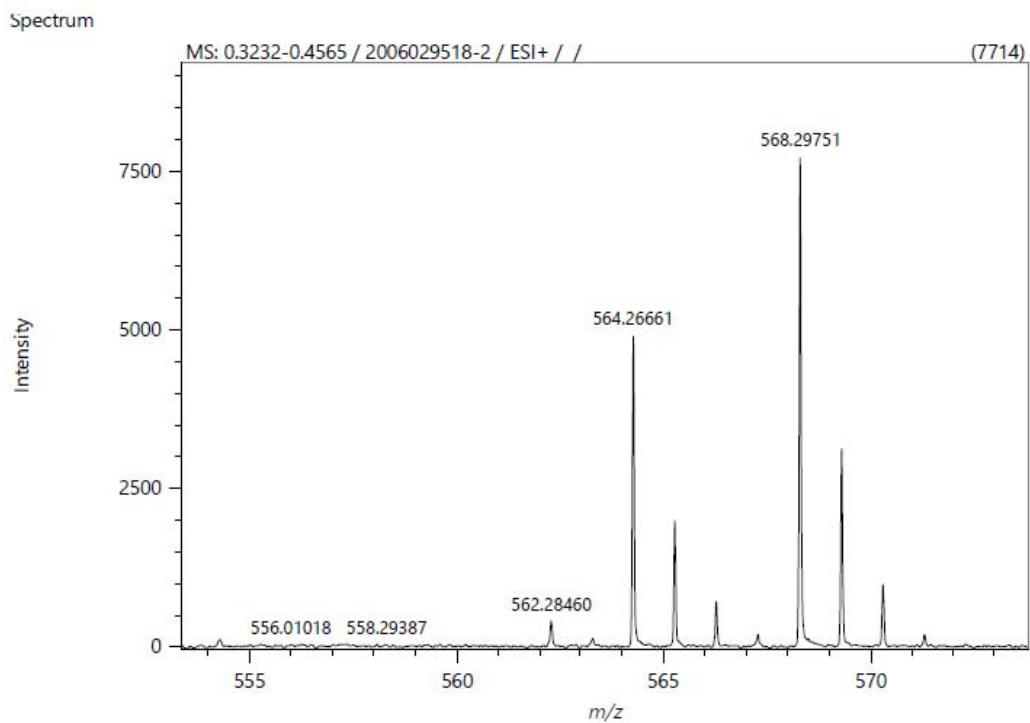

**Fig. S8** HRMS charts of probe **RCIO** upon treatment with  $\text{ClO}^-$ .

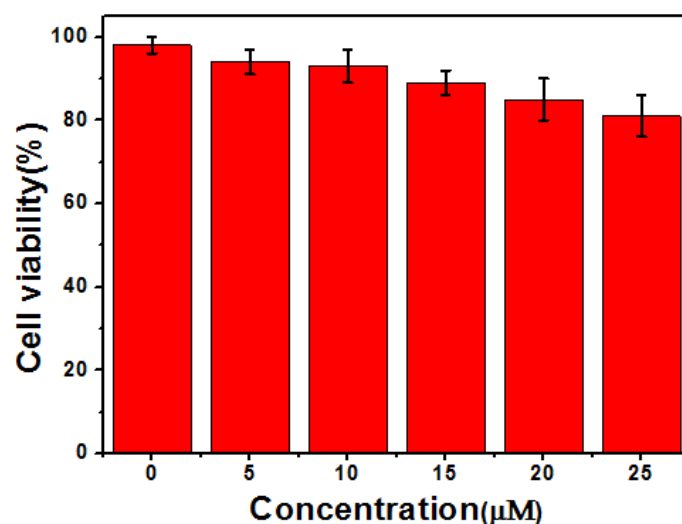

**Fig. S9** Cell viability of HepG2 cells after treated with different concentrations of probe **RCIO** for 12 h. Cell viability was assayed by the MTT method (values: mean  $\pm$  standard deviation).

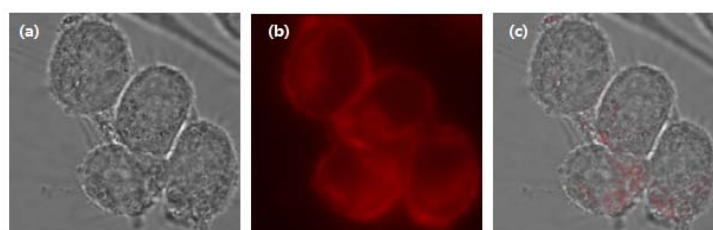

**Fig. S10** Fluorescence images were obtained in a EVOS FL Auto imaging system. (a) Bright field image of the HepG2 cells; (b) HepG2 cells were pretreated with probe **RCIO** (12μM) for 30 min and subsequently treated with  $\text{ClO}^-$  (25μM) for another 30 min ; (c) overlay of (a) and (b) in bright field image;

**Table S1.** Comparison of probe **RCIO** for the detection of  $\text{ClO}^-$

| Reference                          | Response time | Detection limit | Probe structure |
|------------------------------------|---------------|-----------------|-----------------|
| Chem. Commun., 2015 <sup>[1]</sup> | 5 min         | 17.9nM          |                 |

|                                                        |       |         |                                                                                      |
|--------------------------------------------------------|-------|---------|--------------------------------------------------------------------------------------|
| Sens.<br>Actuators B:<br>Chem.,<br>2016 <sup>[2]</sup> | 30min | 500nM   | 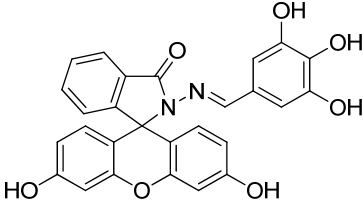   |
| Sensors and<br>Actuators B,<br>2018 <sup>[3]</sup>     | ----- | 720nM   |    |
| Dyes<br>Pigments,<br>2016 <sup>[4]</sup>               | 1min  | 93nM    |  |
| This work                                              | 20s   | 17.8 nM | PBS buffer (pH 7.4, 20 mM,<br>20% DMF                                                |

[1] Xiao H, Xin K, Dou H, Yin G, Quan Y, Wang R. A fast-responsive mitochondria-targeted fluorescent probe detecting endogenous hypochlorite in living RAW 264.7 cells and nude mouse. *Chemical Communications* 2015;51:1442-1445.

[2] Jin X, Jia Y, Chen W, Chui P, Yang Z, A reaction-based fluorescent probe for rapid detection of hypochlorite in tap water, serum, and living cells, *Sens. Actuators B: Chem.* 232 (2016) 300-305.

[3] Deng B B, Ren M G, Kong X Q, Zhou K, Lin W Y. Development of an enhanced turn-on fluorescent HOCl probe with a large Stokes shift and its use for imaging

HOCl in cells and zebrafish. Sensors and Actuators B-Chemical 2018;255:963-969.

[4] Cheng T, Zhao J, Wang Z, An J, Xu Y, Qian X, Liu G, A highly sensitive and selective hypochlorite fluorescent probe based on oxidation of hydrazine via free radical mechanism, Dyes Pigments 126 (2016) 218-223

**Table S2.** Repeatability and reproducibility of probe **RCIO** sensing  $\text{ClO}^-$  in 20 mM potassium phosphate buffer / DMF (1:1 v/v, pH 7.4) at room temperature.

| Sample | $\text{ClO}^-$ spiked<br>( $\mu\text{M}$ ) | $S_R$ | $\text{RSD}_R$ (%) |
|--------|--------------------------------------------|-------|--------------------|
| S1     | 10                                         | 23.5  | 2.86               |
| S2     | 20                                         | 25.5  | 1.39               |
| S3     | 30                                         | 52.8  | 1.89               |
| S4     | 40                                         | 28.9  | 0.79               |
| S5     | 50                                         | 57.8  | 1.48               |

Number of independent measurements per sample:  $n=3$ ;  $S_R$ : reproducibility standard deviation;  $\text{RSD}_R$  (%): reproducibility relative standard deviation.

**Determination of relative standard deviation (RSD):** The RSD were calculated based on the following equations.

$$\bar{x} = \frac{x_1 + x_2 + \dots + x_n}{n}$$
$$s = \sqrt{\frac{\sum_{i=1}^n (x_i - \bar{x})^2}{n-1}}$$
$$\text{RSD} = \frac{s}{\bar{x}} \times 100\%$$

Where  $x_1, \dots, x_n$  are measured values of the sample items;  $\bar{x}$  is the mean value of these measurements;  $n$  is the total number of measurements;  $i$  is the number of measurement;  $s$  is the standard deviation.
